# Supplementary material for: Self-assembly of a stereoselective trinuclear sodium/lithium triple helix
Source: Royal Society of Chemistry journal article supplement (doi:10.1039/b205440j), 2002-01-01
Supplement: b205440j.doc [file b205440j.doc]

Supplementary Material (ESI) for Chemical Communications

This journal is © The Royal Society of Chemistry 2002

Self-assembly of a stereoselective trinuclear sodium/lithium triple helix.

Magdalena Capó.*a José M. Saáa and Angel Alvarezb

a Departament de Química, Universitat de les Illes Balears, 07071 Palma de Mallorca, Spain bDepartament de Cristalografia, U. A. B., Barcelona, Spain

1. Determination of the 1:1 Stoichiometry by NMR titration: 30-100µl aliquots of (9.6 mmol of LiOTf in 100µl CD3CN) were sequentially added to a CD3CN solution of **1**, (8.18 mmol in 500µl) and the spectrum was recorded after each addition**.** A) Pure ligand **1.** B) pure complex **5**
